# Supplementary material
Source: PubMed Central journal article supplement (PMC3522281)
Supplement: supp_M112.420976_jbc.M112.420976-1.pdf [file supp_M112.420976_jbc.M112.420976-1.pdf]

## Supplementary Table I

### Primers used throughout this study

| Primers                                                   | Sequence                |
|-----------------------------------------------------------|-------------------------|
| Degenerated primers for PCR cloning                       |                         |
| Td 5-F                                                    | CAR TGY CCN TGY GAY GG  |
| Td 5-R                                                    | CC RTC RCA NGG RCA YTG  |
| Td 6-F                                                    | AA Y ATG TGY GAR AAY GT |
| Td 6-R                                                    | AC RTT YTC RCA CAT RTT  |
| Td 7-F                                                    | TGY GAR GCN ATG CAR AC  |
| Td 7-R                                                    | GT YTG CAT NGC YTC RCA  |
| Sequence specific primers used for sequencing cDNA clones |                         |
| AM-1F                                                     | GTG CAT CCA AAG AAT TCG |
| AM-1R                                                     | CGA ATT CTT TGG ATC CAC |
| AM-2F                                                     | TTA CAA CGT CAT CGA CGT |
| AM-2R                                                     | ACG TCG ATG ACG TTG TAA |
| AM-3F                                                     | GAC GTC AAA TTG AGC GAA |
| AM-3R                                                     | TTC GCT CAATTT GAC GTC  |
| AM-4F                                                     | CGG TGC GAG GCC ATG CAA |
| AM-4R                                                     | TTG CAT GGC CTC GCA CCG |

R=A/G; Y=C/T; N= any base
